# Supplementary material
Source: publisher figshare collection journal article supplement (https://gsajournals.figshare.com/ndownloader/files/18059186)
Supplement: Supplementary file 1 [file 18059186]

**Figure S4. Phylogeny of interferon (IFN) protein family**
